# Supplementary material for: Physiological Remediation of Cobalt Ferrite Nanoparticles by Ferritin
Source: PubMed Central journal article supplement (PMC5220348; doi:10.1038/srep40075), 2017-01-09
Supplement: srep40075-s1.pdf [file srep40075-s1.pdf]

**Supplementary materials**

**Physiological Remediation of Cobalt Ferrite Nanoparticles by Ferritin**

*Jeanne Volatron,<sup>1</sup> Jelena Kolosnjaj-Tabi,<sup>1,2</sup> Yasir Javed,<sup>3</sup> Quoc Lam Vuong,<sup>4</sup> Yves Gossuin,<sup>4</sup> Sophie Neveu,<sup>5</sup> Nathalie Luciani,<sup>1</sup> Miryana Hémadi,<sup>6</sup> Florent Carn,<sup>1</sup> Damien Alloyeau,<sup>3</sup> Florence Gazeau<sup>1</sup>*

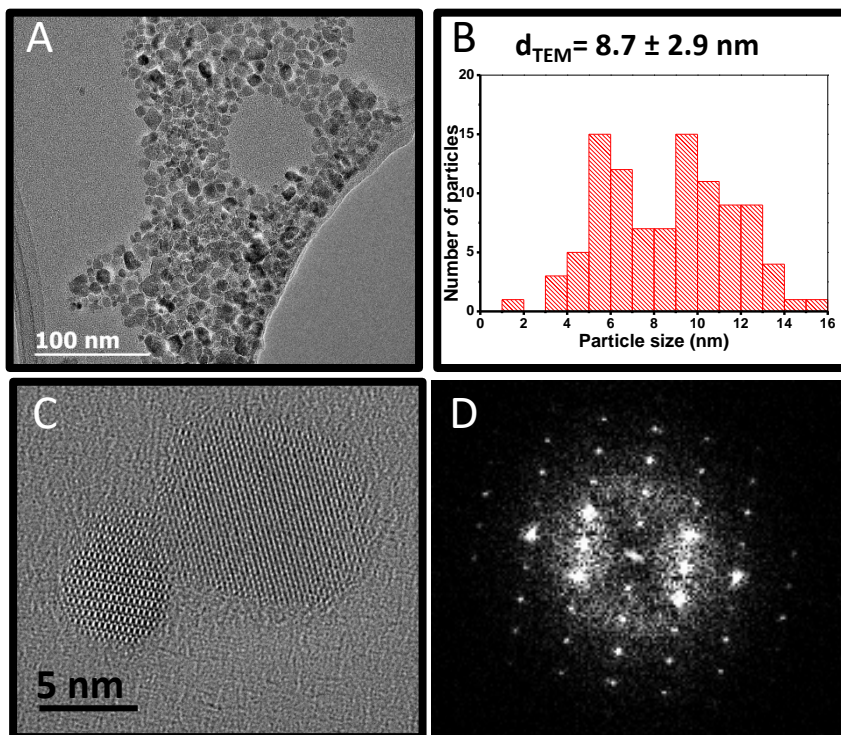

**Figure S1: Characteristics of CoIONPs.** A) TEM images of citrate-coated CoIONPs and B) corresponding TEM size distribution with a mean diameter of  $(8.7 \pm 2.9$  nm). C) High resolution images of CoIONPs and D) FFT of selected particles show monocrystalline inverse spinel structure oriented along the [112] zone axes.

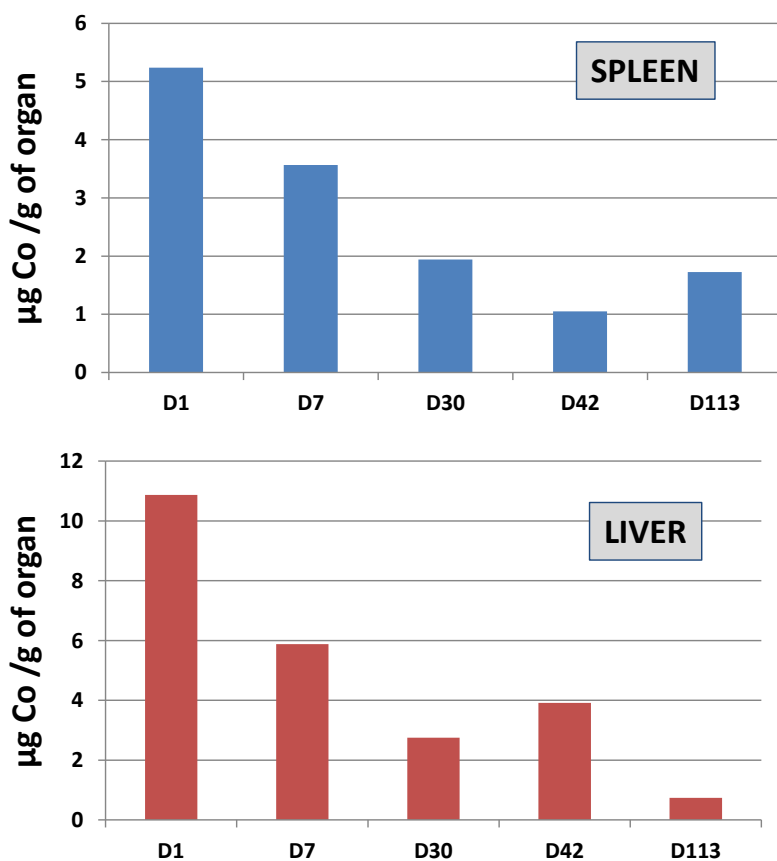

**Figure S2:** ICP-MS quantification of Co content in spleen and liver of mice injected with CoIONPs (50  $\mu\text{mol}$  iron/kg body weight) at different time-points after injection indicated in days. The amount of Co is expressed as  $\mu\text{g}$  Co per g of fresh organ. Note the diminution over time of the cobalt content, but also the persistence in spleen of one third of the Co content at day 1, almost 4 months after injection.

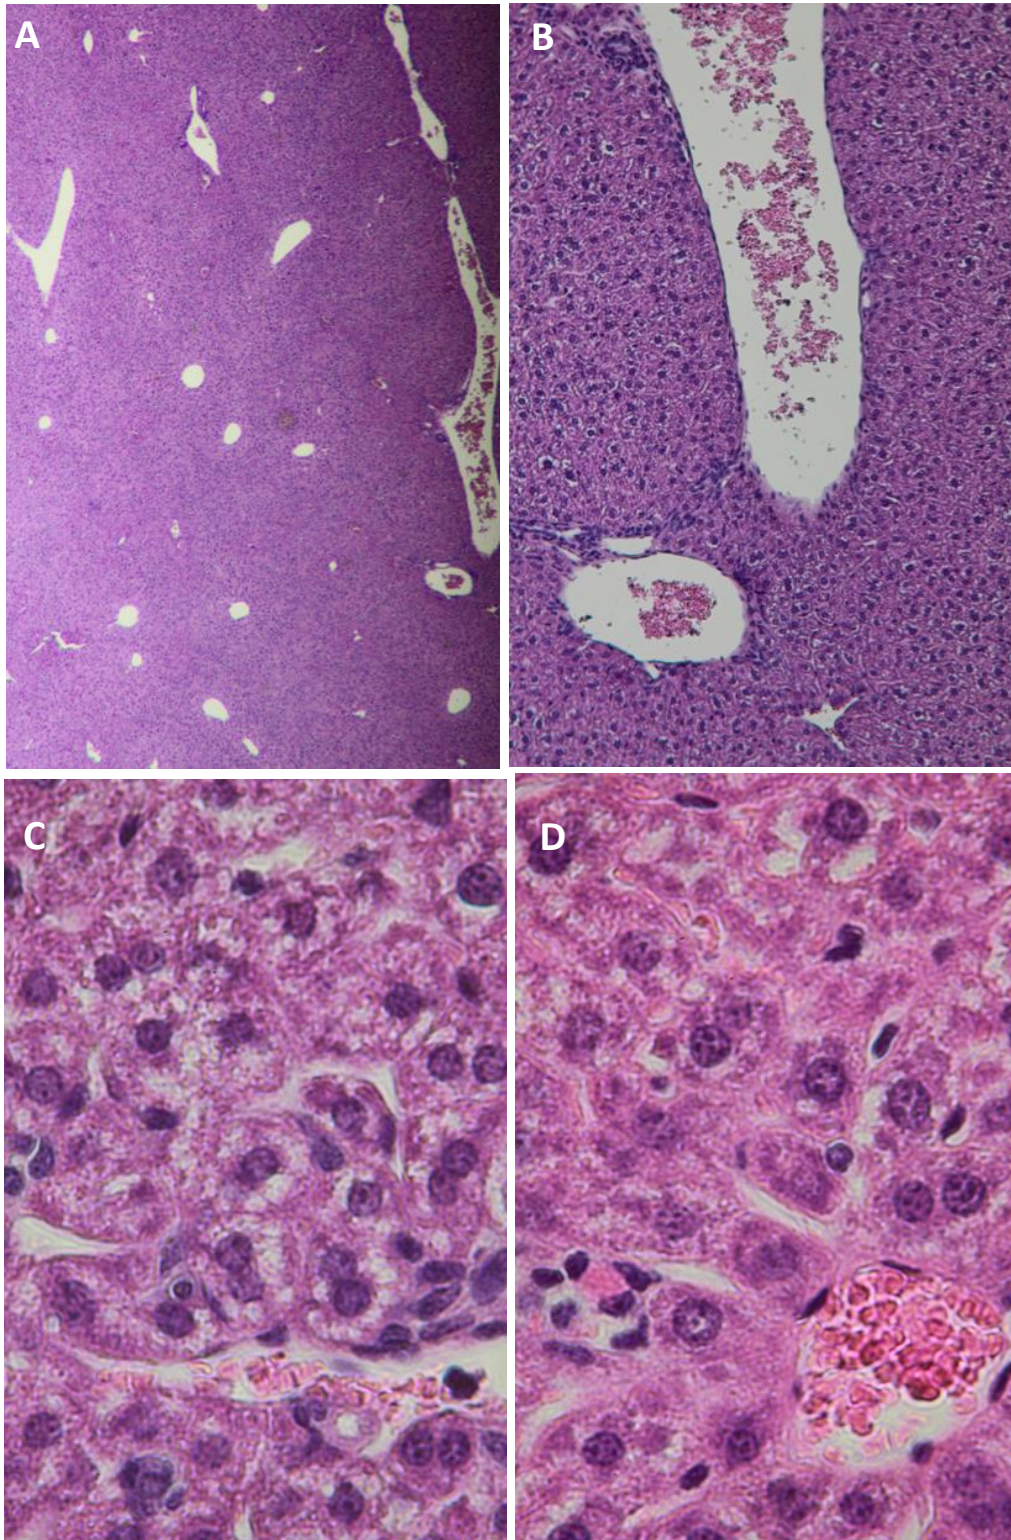

**Figure S3:** Histological staining (hematoxylin and eosin) of mouse liver at day 1 post-injection of nanoparticles (A, B, C) and in control non-injected mouse (D). Magnification are 2.5 (A), 10 (B) and 63 (C&D).



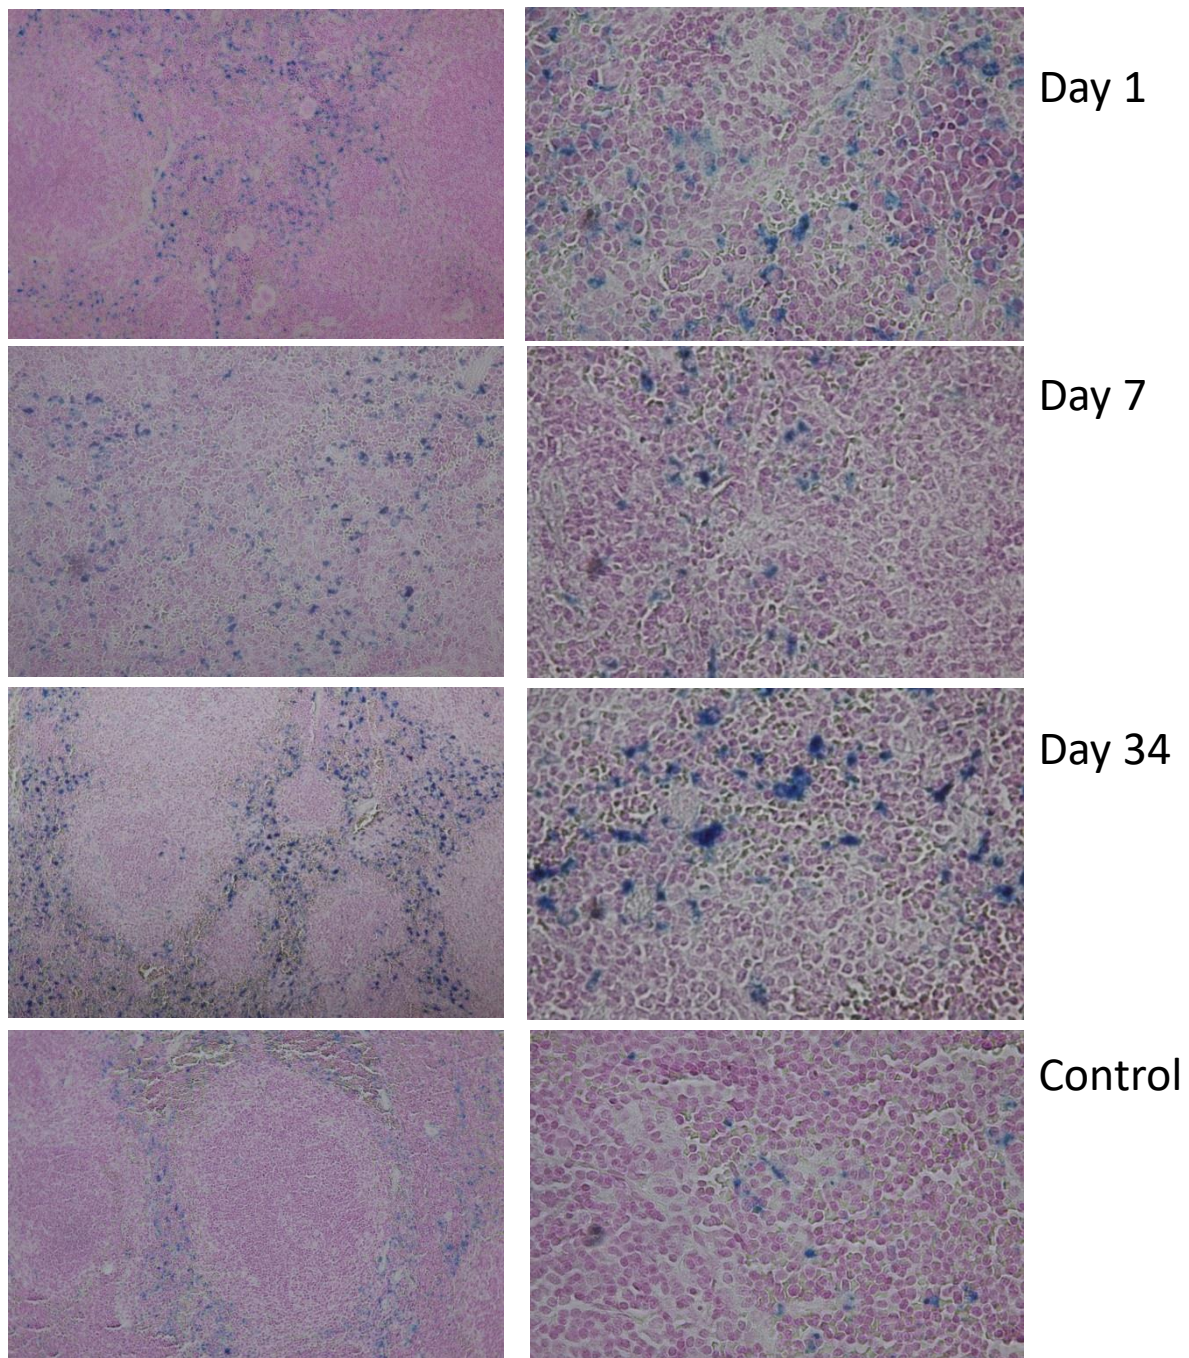

**Figure S4:** Histological staining (Pearls staining highlighting iron in blue) of mouse spleen at day 1, day 7 and day 34 post-injection of nanoparticles and in control non-injected mouse. Magnifications are x10 (left) and x20 (right).



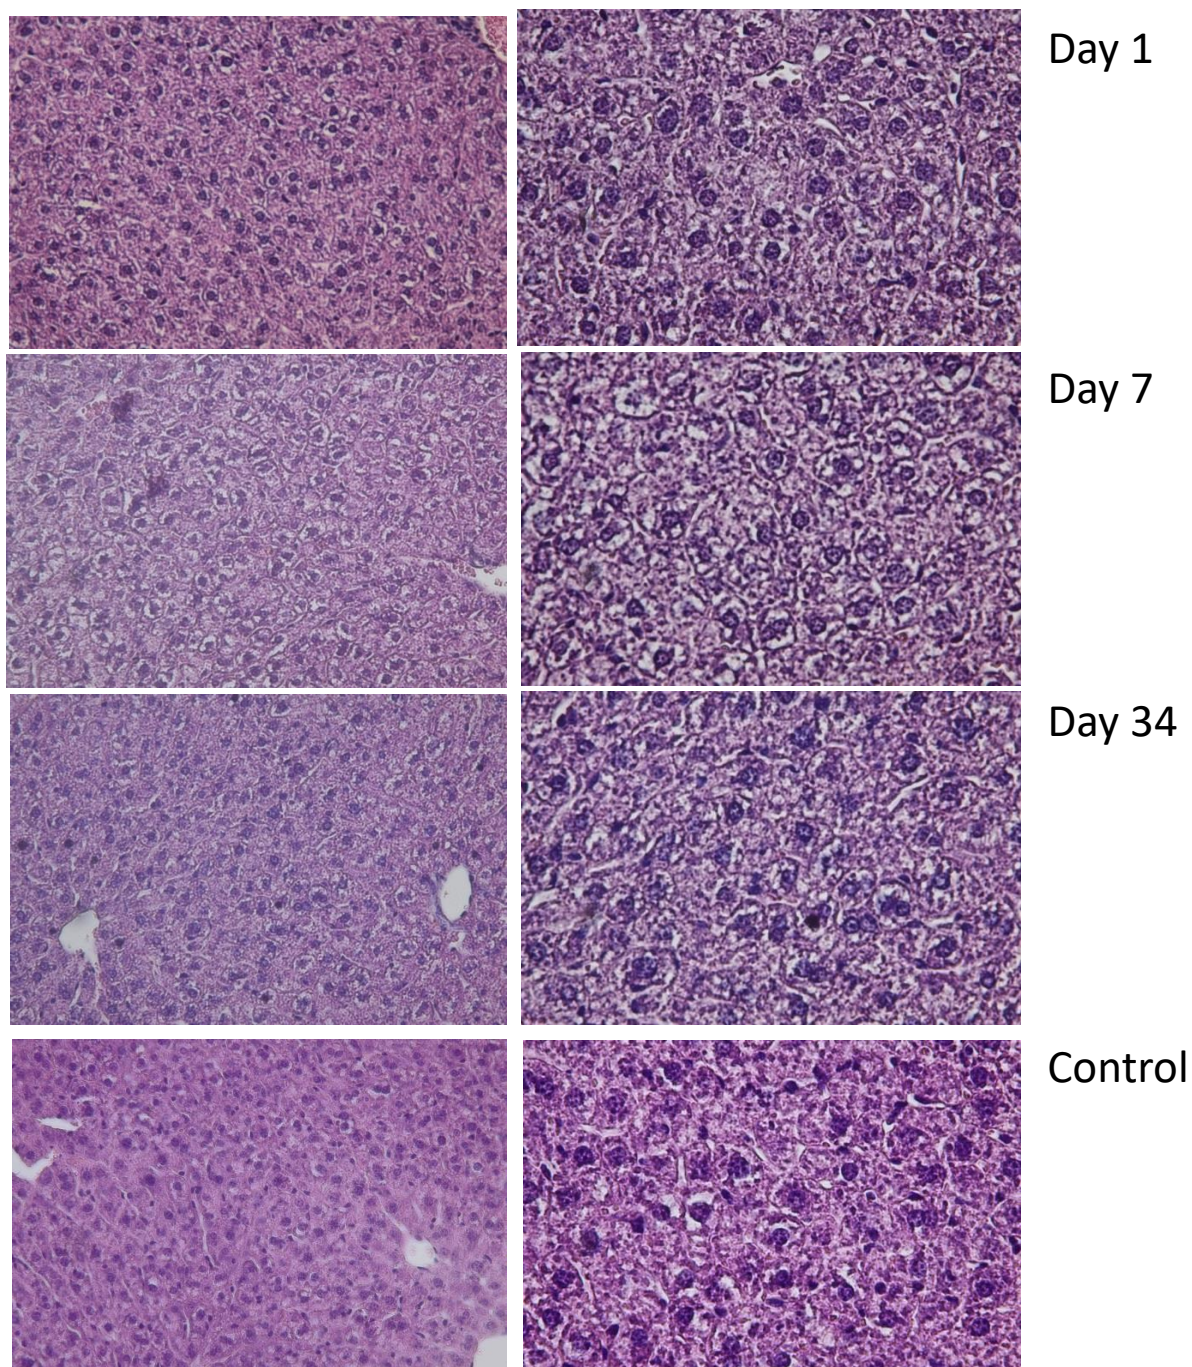

**Figure S5:** Histological staining (hematoxylin and eosin) of mouse liver at day 1, day 7 and day 34 post-injection of nanoparticles and in control non-injected mouse. Magnification are x20 (left) and x40 (right).



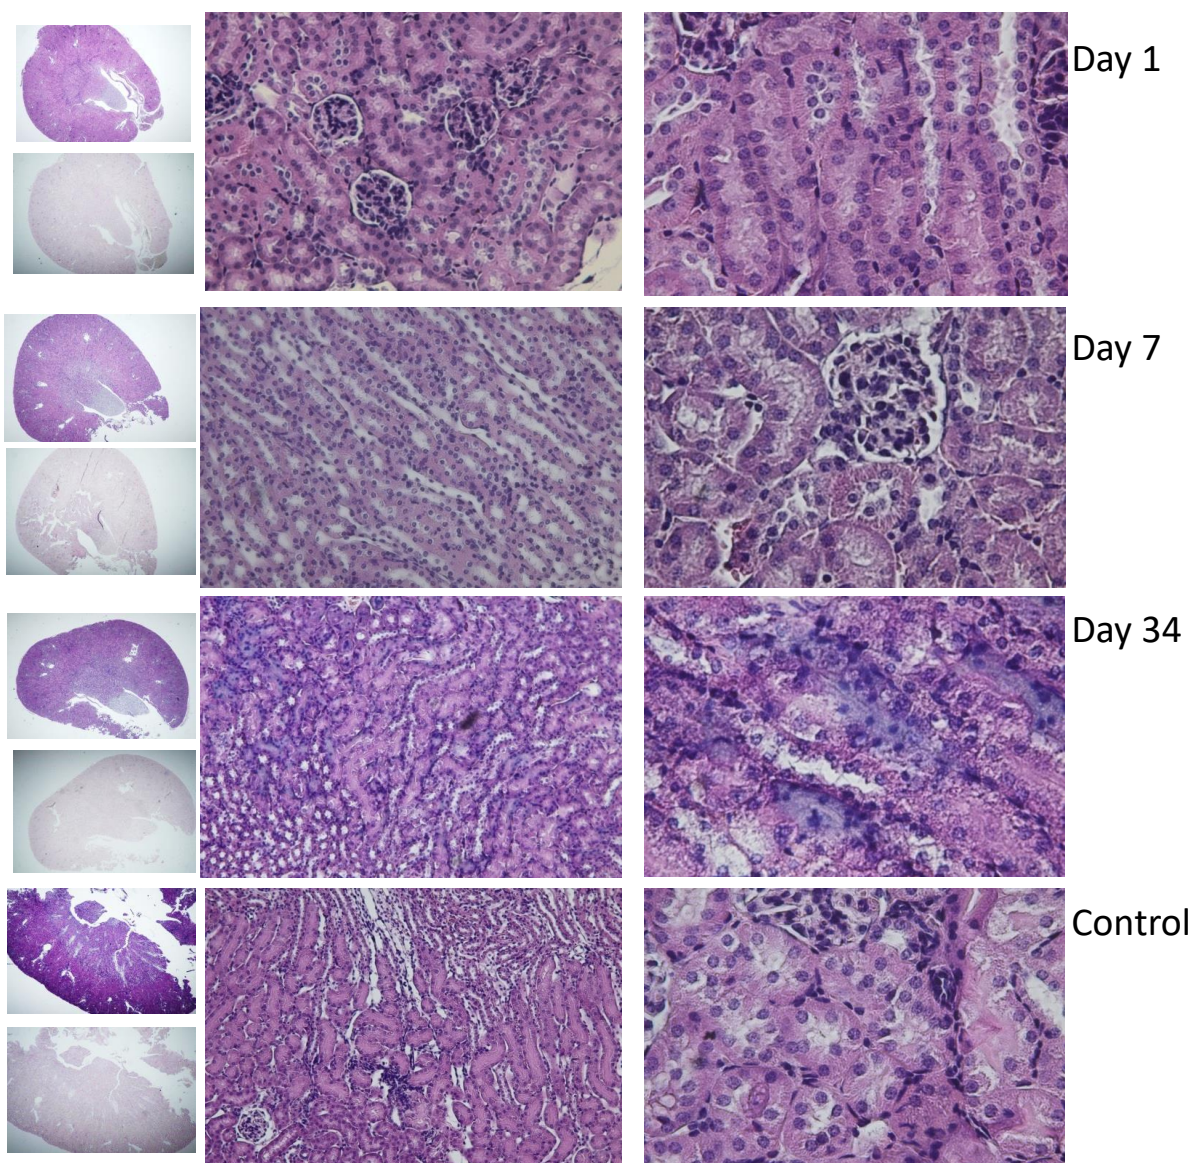

**Figure S6:** Histological staining (hematoxylin and eosin) of mouse kidney at day 1, day 7 and day 34 post-injection of nanoparticles and in control non-injected mouse. Magnification are x1.6 (left), x20 (middle) and x40 (right).

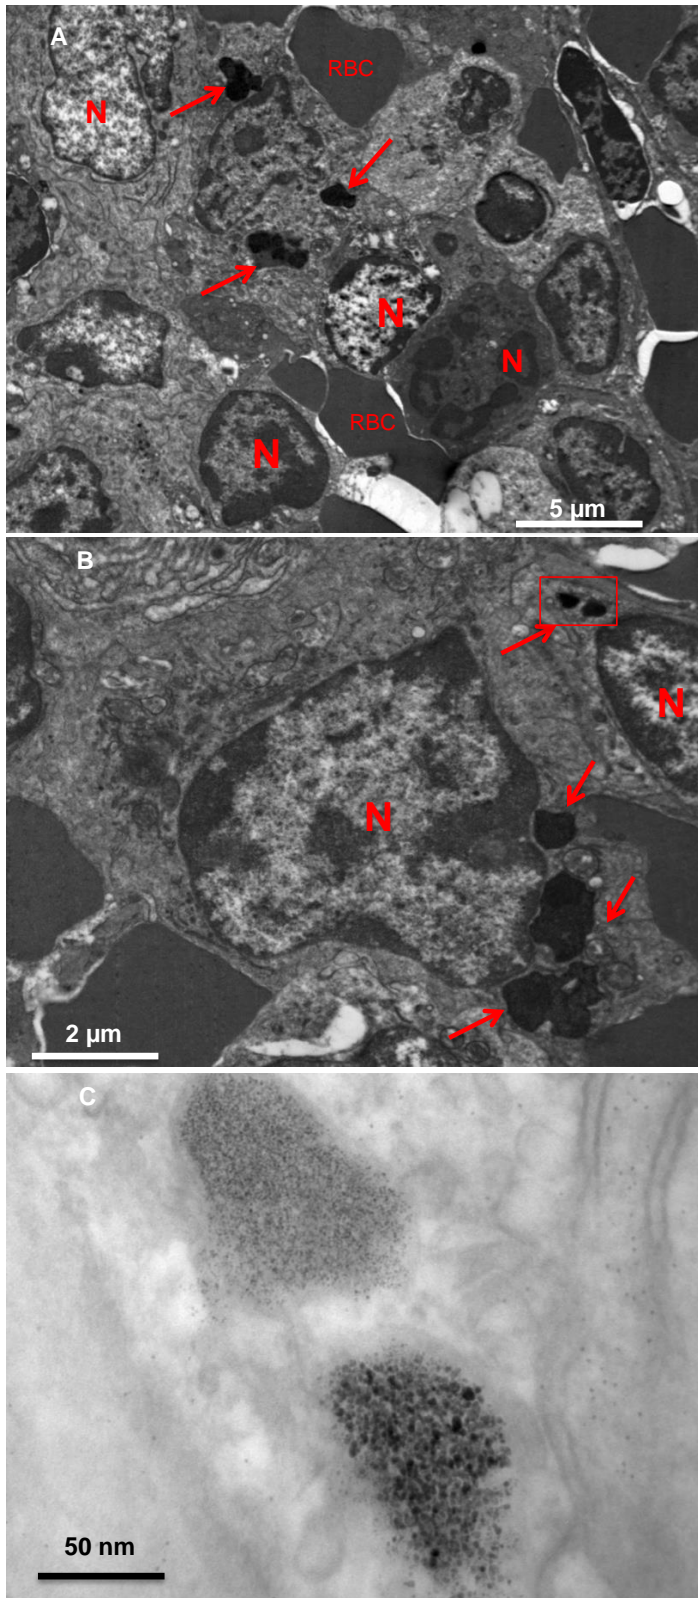

**Figure S7:** Electron microscopy general and magnified view of the spleen at D34 post injection. N=nucleus, arrow nanoparticle-rich zone, RBC = red blood cell. The red square in B is magnified in C and it reveals two families of nanoparticles that exhibit different sizes and electron density, probably pertaining to ferritins (upper) and cobalt ferrite nanoparticle remnants (lower group).
